# Supplementary material for: A Series of Polymer-Supported Polyoxometalates as Heterogeneous Photocatalysts for Degradation of Organic Dye
Source: MDPI journal article supplement (doi:10.3390/molecules28093968), 2023-05-08
Supplement: s1 [file s1]

# A Series of Polymer-Supported Polyoxometalates as Heterogeneous Photocatalysts for Degradation of Organic Dye

Fan Yang, Xiaojiao He, Tingting Xin, Huizhen Yang, Lijie Bai, Lihua Gao and Yibo Wang \*

Department of Chemistry, Beijing Technology and Business University, Beijing 100048, China;

\* Correspondence: wangyb@th.btbu.edu.cn

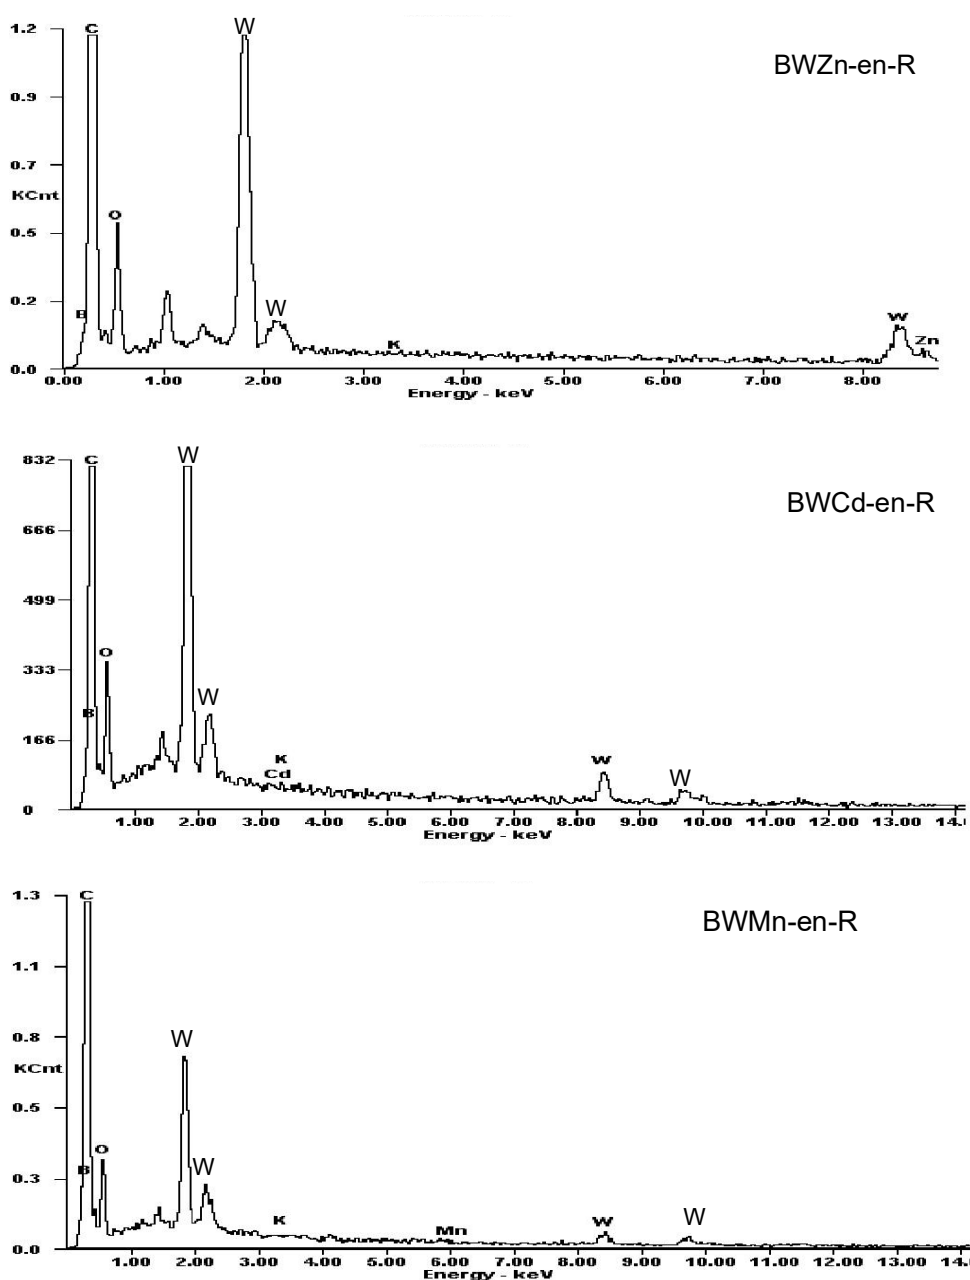

Figure S1. EDS spectra of BWM-en-R (M = Zn, Cd, Mn).

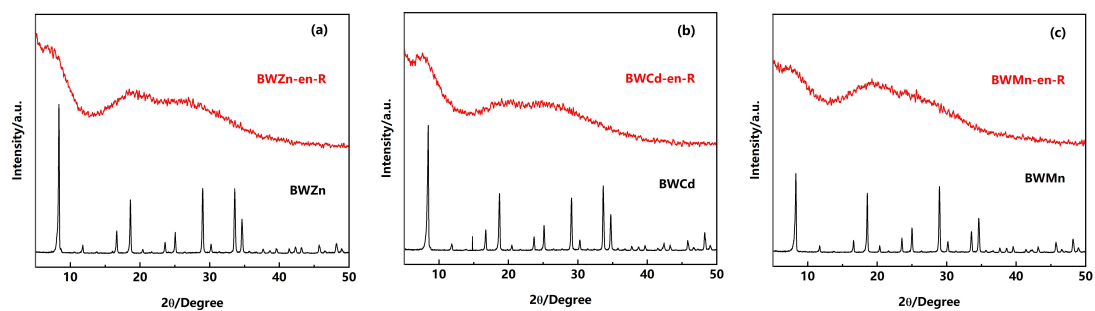

**Figure S2.** XRD patterns of BWZn and BWZn-en-R (a), BWCd and BWCd-en-R (b), BWMn and BWMn-en-R (c).

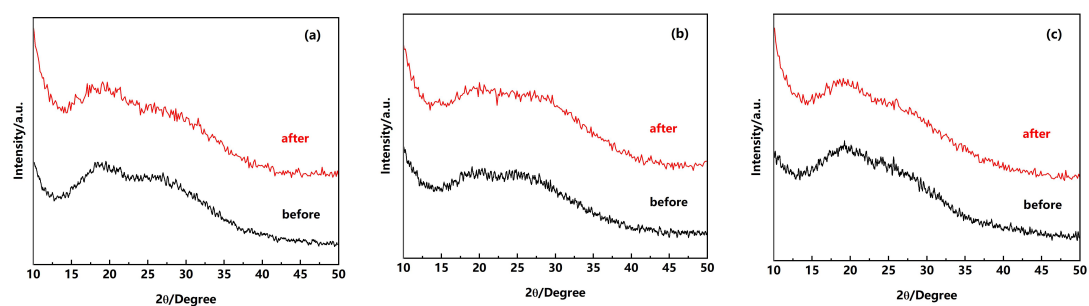

**Figure S3.** XRD patterns of BWZn-en-R (a), BWCd-en-R (b) and BWMn-en-R (c) before and after photocatalytic degradation of MR.
